# Supplementary material
Source: Springer Nature journal article supplement (https://www.springermedizin.de/resource/supplementary/12935_2010_252_MOESM5_ESM.pdf/9540150)

**Hoechst****FITC-Annexin V****Caspase 3/7****merge****A****control**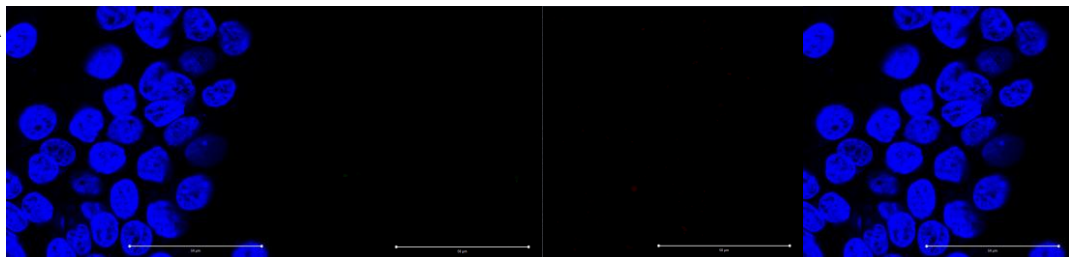**B****TICE**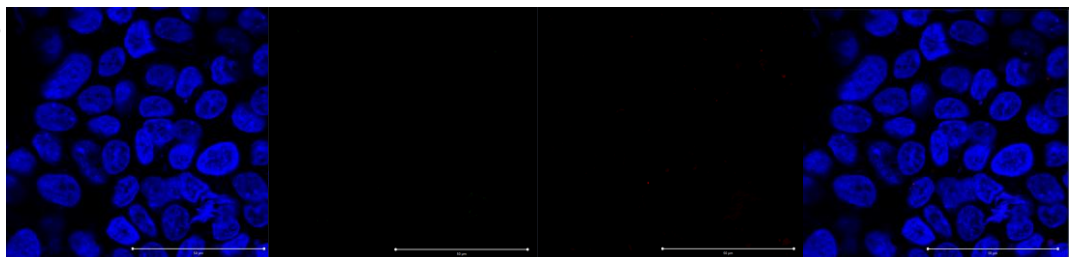**C****S4-Jena**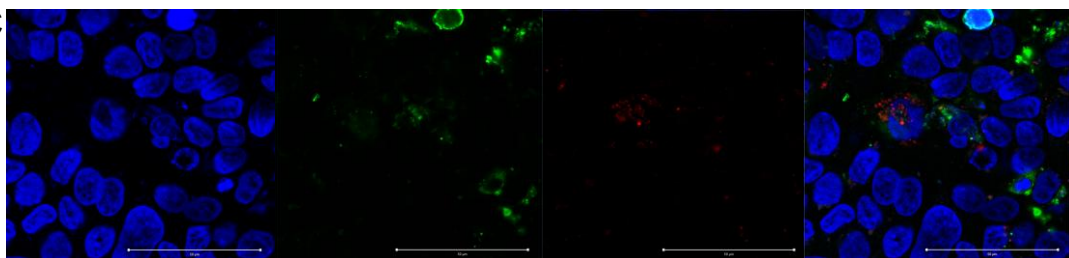

Supplement: MOESM5 [file 9540150]
